# Supplementary material for: Characterisation of tumour-derived microvesicles in cancer patients’ blood and correlation with clinical outcome
Source: PubMed Central journal article supplement — J Extracell Vesicles. 2017 Jul 16;6(1):1340745. doi: 10.1080/20013078.2017.1340745 (PMC5533131; doi:10.1080/20013078.2017.1340745), 2017-07-16
Supplement: zjev_a_1340745_sm8062.pdf [file zjev_a_1340745_sm8062.pdf]

## Supplementary Table 1: Blood cell counts in the study cohort

| blood parameters     | n = | distribution<br>median [95% CI] | Unit                 | Reference Range              |
|----------------------|-----|---------------------------------|----------------------|------------------------------|
| <b>Hemoglobin</b>    |     |                                 |                      |                              |
| cancer patients      | 248 | 13.0 [12.49-12.98]              | g/dl                 | 12 - 16 (women), 14-18 (men) |
| non-healthy controls | 42  | 13.35 [12.75-13.79]             |                      |                              |
| <b>Platelets</b>     |     |                                 |                      |                              |
| cancer patients      | 246 | 252.0 [261.05-289.83]           | x10 <sup>3</sup> /μl | 150 – 400                    |
| non-healthy controls | 42  | 206.5 [203.72-245.33]*          |                      |                              |
| <b>Leukocytes</b>    |     |                                 |                      |                              |
| cancer patients      | 248 | 8.13 [8.44-9.42]                | x10 <sup>3</sup> /μl | 4 - 10                       |
| non-healthy controls | 42  | 6.28 [6.19-7.75]**              |                      |                              |

Reference values are from the University Medical Center Göttingen.

\*p=1.1680e-04

\*\*p=5.2840e-05

**Supplementary Table 2: Univariate Analysis of overall survival in the total study cohort (n=433)**

| parameter           | # patients | Hazard ratio [95% CI] | p-value   |
|---------------------|------------|-----------------------|-----------|
| Age                 | 433        | 1.02 [1.01-1.03]      | 2.250e-04 |
| Gender<br>f<br>m    | 192<br>241 | 1.09 [0.8-1.5]        | 0.574     |
| Stage<br>< IV<br>IV | 307<br>126 | 2.17 [1.59-2.97]      | 1.180e-06 |
| EMMPRIN             | 430        | 1.02 [1.0-1.04]       | 0.016     |
| MUC1                | 423        | 1.03 [0.98-1.07]      | 0.236     |
| EpCAM               | 421        | 1.03 [0.98-1.07]      | 0.245     |
| EGFR                | 422        | 0.99 [0.94-1.06]      | 0.932     |

Univariate analysis of overall survival in the total study cohort (n=433). Besides age and tumor stage, EMMPRIN was found to be associated significantly with overall survival. Reduced patient numbers for different parameters due to missing measurement values. Shown are logrank p-values.

**Supplementary Table 3: Univariate analysis for EMMPRIN in the total study cohort (n=433)**

| Univariate analysis |                |           |                       |            |         |
|---------------------|----------------|-----------|-----------------------|------------|---------|
| parameter           | classification | threshold | distribution [95% CI] | # patients | p-value |
| Age                 |                | >= 29.1   | 63.67 [61.85-65.33]   | 247        | 0.133   |
|                     |                | < 29.1    | 62.1 [60.28-65.25]    | 183        |         |
| Gender              | f              | >= 29.1   |                       | 110        | 1.000   |
|                     | f              | < 29.1    |                       | 82         |         |
|                     | m              | >= 29.1   |                       | 137        |         |
|                     | m              | <29.1     |                       | 101        |         |
| Stage               | <IV            | >= 29.1   |                       | 161        | 0.004   |
|                     | <IV            | < 29.1    |                       | 143        |         |
|                     | IV             | >= 29.1   |                       | 86         |         |
|                     | IV             | <29.1     |                       | 40         |         |

## Supplementary Figure 1

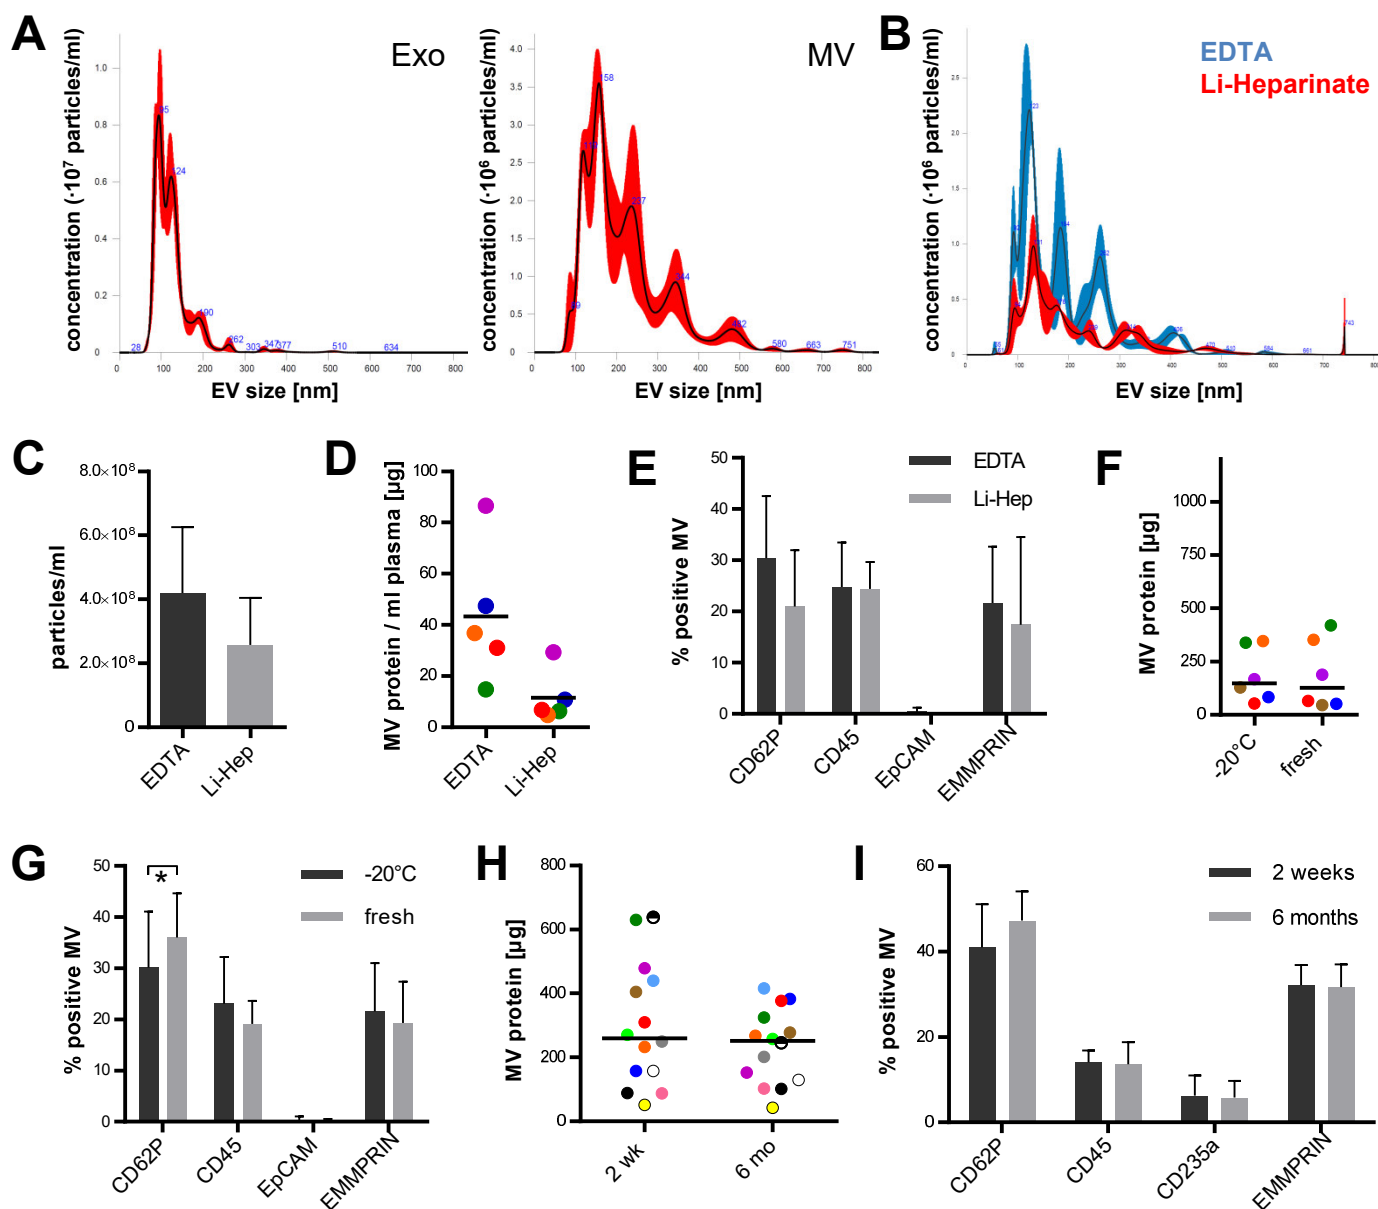

**Supplementary Figure 1: Validation of the isolation protocol for MV from peripheral blood.** **A**, MV and Exo were isolated from the same donor and resuspended in the same volume of PBS. Size distribution of EV samples was measured by nanoparticle tracking analysis (NTA) at a dilution of 1:33. **B-E**, Peripheral blood was drawn from each of five donors into two tubes containing EDTA and two tubes containing Li-Heparinate (Li-Hep, 16 I.E./ml blood). MV were isolated and analyzed by NTA. Shown is one representative overlay of MV from one donor (**B**) and the summary of all analyzed MV samples (**C**,  $n=3$ , mean $\pm$ SD). MV protein yield (**D**) was determined (line=median) and standard markers assessed by flow cytometry (**E**, mean $\pm$ SD,  $n=3-5$ ). Samples from the same donor are marked in the same color. **F+G**, EDTA-anticoagulated blood was collected from six donors and plasma samples were divided by two. One half was directly subjected to MV isolation, the other half was stored for  $\leq 2$  weeks at  $-20^\circ\text{C}$  and then used for MV isolation. EV yields were determined by quantification of total protein (**F**, line at median) and obtained MV analyzed by flow cytometry (**G**, mean $\pm$ SD,  $n=6$ ,  $*p<0.05$ ). **H+I**, EDTA-anticoagulated plasma samples from 14 donors were divided by two and stored at  $-20^\circ\text{C}$  for either 2 weeks (2 wk) or 6 months (6 mo) before isolating MV. Total MV protein was quantified (**H**, line at median) and MV further characterized by flow cytometry (**I**, mean $\pm$ SD,  $n=10$ ).

## Supplementary Figure 2

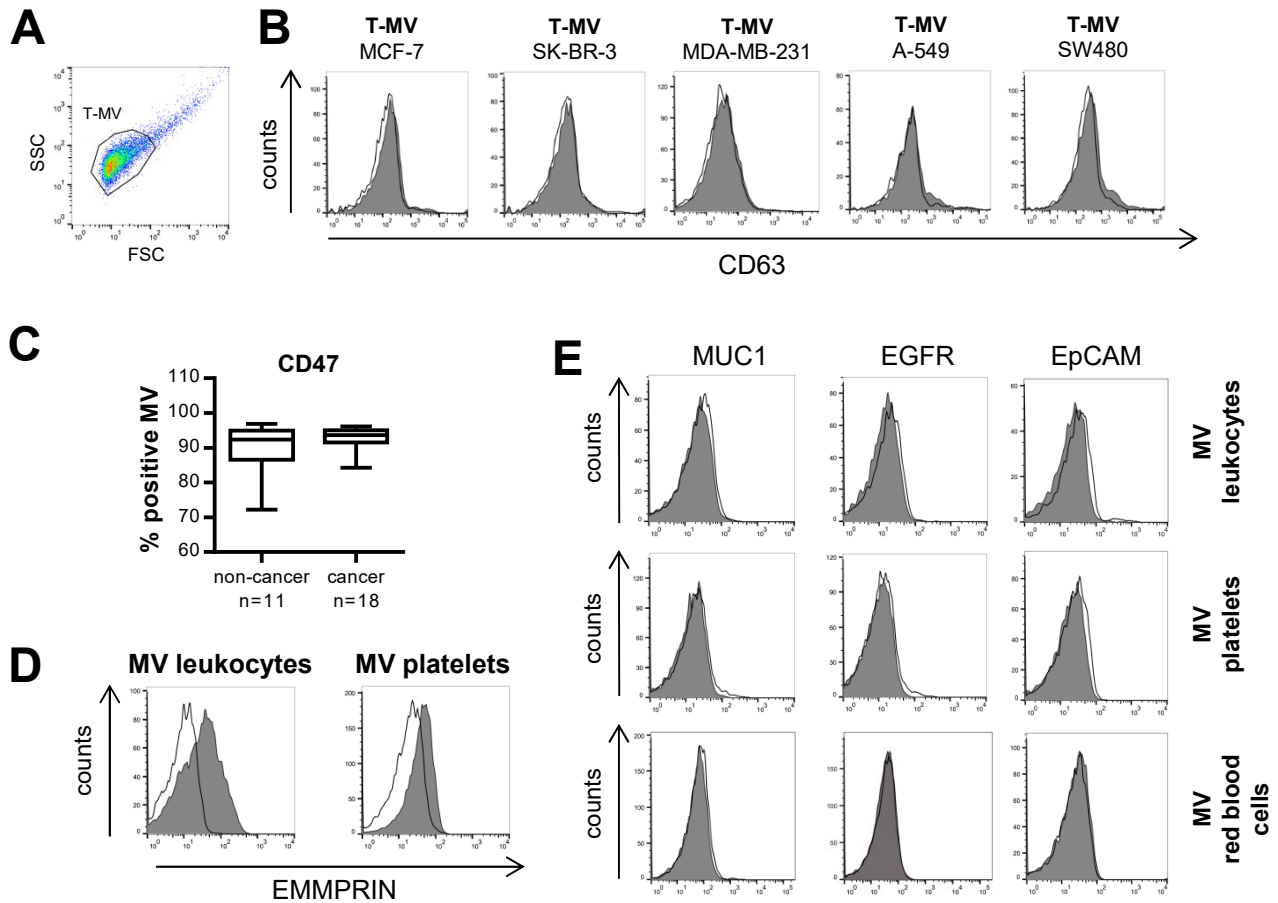

**Supplementary Figure 2: Establishment of markers specific for T-MV.** *A*, Flow cytometry: Example of a FSC vs SSC plot (*A*) that was used to gate on the MV population that was then characterized further for the expression of different antigens. *B*, Expression of CD63 (grey filled) was analyzed by flow cytometry on T-MV of the indicated five cell lines. The respective isotype controls are shown as black lines. Histograms are representative of at least three independent experiments. *C*, The percentage of CD47<sup>+</sup> MV in peripheral blood of cancer patients and non-cancer controls was measured by flow cytometry. Boxplots depict the median (line), the 25-75 percentiles (box) and the 10-90 percentiles (whiskers). *D*, Representative flow cytometry histograms (n=3): Expression of EMMPRIN (grey filled) on platelet- and macrophage-derived MV. *E*, Characterization of tumor antigens (grey filled) on blood cell-derived MV. The histograms are representative of three independent experiments.

## Supplementary Figure 3

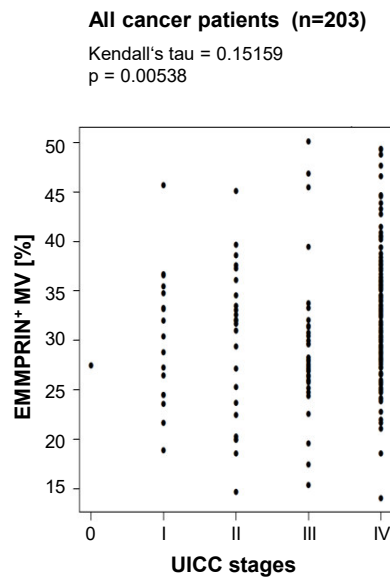

**Supplementary Figure 3: The number of EMMPRIN<sup>+</sup> MV in cancer patients' blood correlates with tumor stage.** Kendall-Tau correlation of the percentage of EMMPRIN<sup>+</sup> MV in cancer patients' blood with the diagnosed UICC stage at the time of sample acquisition.
